# Supplementary material for: Studies on the Crystal Forms of Istradefylline: Structure, Solubility, and Dissolution Profile
Source: MDPI journal article supplement (doi:10.3390/cryst12070917), 2022-06-28
Supplement: s1 [file s1]

## Supporting Information

### 1. Solubility of Istradefylline in Twelve Different Solvents

The solubility data and the relative deviations of Istradefylline in seven single-solvents and five mixed-solvents in the range of 293.15 K to 333.15 K were recorded in Table S1.

Table S1. Solubility of Istradefylline in Twelve Different Solvents from 293.15 K to 333.15 K

| solvent       | $T / K$ | $x$                    | $x^{calc}$             | $100\delta$ | Solubility<br>(mg/mL) | equilibrium crystal<br>form of<br>Istradefylline |
|---------------|---------|------------------------|------------------------|-------------|-----------------------|--------------------------------------------------|
| methanol      | 293.15  | $6.0102 \cdot 10^{-5}$ | $5.9562 \cdot 10^{-5}$ | 0.899       | 0.6308                | form II                                          |
|               | 303.15  | $1.4165 \cdot 10^{-4}$ | $1.4584 \cdot 10^{-4}$ | 2.961       | 0.9521                |                                                  |
|               | 313.15  | $3.4118 \cdot 10^{-4}$ | $3.3726 \cdot 10^{-4}$ | 1.150       | 1.4868                |                                                  |
|               | 323.15  | $7.3909 \cdot 10^{-4}$ | $7.4041 \cdot 10^{-4}$ | 0.179       | 2.2726                |                                                  |
|               | 333.15  | $1.5504 \cdot 10^{-3}$ | $1.5504 \cdot 10^{-3}$ | 0.024       | 3.5819                |                                                  |
| ethanol       | 293.15  | $9.7065 \cdot 10^{-5}$ | $1.1608 \cdot 10^{-4}$ | 19.595      | 0.7061                | form I                                           |
|               | 303.15  | $2.6974 \cdot 10^{-4}$ | $2.5357 \cdot 10^{-4}$ | 5.995       | 1.9625                |                                                  |
|               | 313.15  | $5.6205 \cdot 10^{-4}$ | $5.2695 \cdot 10^{-4}$ | 6.245       | 4.0904                |                                                  |
|               | 323.15  | $1.0077 \cdot 10^{-3}$ | $1.0467 \cdot 10^{-3}$ | 3.633       | 7.3371                |                                                  |
|               | 333.15  | $2.0067 \cdot 10^{-3}$ | $1.9955 \cdot 10^{-3}$ | 0.721       | 14.6255               |                                                  |
| ethyl acetate | 293.15  | $1.8223 \cdot 10^{-3}$ | $1.6380 \cdot 10^{-3}$ | 9.998       | 7.9374                | form I                                           |
|               | 303.15  | $2.5023 \cdot 10^{-3}$ | $2.4449 \cdot 10^{-3}$ | 2.205       | 9.9952                |                                                  |
|               | 313.15  | $3.3527 \cdot 10^{-3}$ | $3.5650 \cdot 10^{-3}$ | 6.417       | 14.0693               |                                                  |
|               | 323.15  | $5.0619 \cdot 10^{-3}$ | $5.0931 \cdot 10^{-3}$ | 0.654       | 22.1199               |                                                  |
|               | 333.15  | $7.2279 \cdot 10^{-3}$ | $7.1484 \cdot 10^{-3}$ | 1.129       | 31.6541               |                                                  |
| n-propanol    | 293.15  | $2.0195 \cdot 10^{-4}$ | $2.5122 \cdot 10^{-4}$ | 24.395      | 1.1470                | form I                                           |
|               | 303.15  | $3.5509 \cdot 10^{-4}$ | $4.4287 \cdot 10^{-4}$ | 24.720      | 2.0172                |                                                  |
|               | 313.15  | $8.7513 \cdot 10^{-4}$ | $7.5357 \cdot 10^{-4}$ | 13.891      | 5.1910                |                                                  |
|               | 323.15  | $1.2359 \cdot 10^{-3}$ | $1.2422 \cdot 10^{-3}$ | 0.178       | 7.0270                |                                                  |
|               | 333.15  | $1.9753 \cdot 10^{-3}$ | $1.9906 \cdot 10^{-3}$ | 0.536       | 16.8872               |                                                  |
| isopropanol   | 293.15  | $2.2444 \cdot 10^{-4}$ | $2.4557 \cdot 10^{-4}$ | 9.416       | 1.154                 | form I                                           |
|               | 303.15  | $3.5486 \cdot 10^{-4}$ | $3.8601 \cdot 10^{-4}$ | 8.779       | 1.825                 |                                                  |
|               | 313.15  | $6.5393 \cdot 10^{-4}$ | $5.9059 \cdot 10^{-4}$ | 9.687       | 3.364                 |                                                  |
|               | 323.15  | $8.6390 \cdot 10^{-4}$ | $8.8232 \cdot 10^{-4}$ | 2.132       | 4.444                 |                                                  |
|               | 333.15  | $1.2872 \cdot 10^{-3}$ | $1.2911 \cdot 10^{-3}$ | 0.083       | 6.625                 |                                                  |
| n-butanol     | 293.15  | $5.8994 \cdot 10^{-4}$ | $5.1872 \cdot 10^{-4}$ | 12.073      | 2.479                 | form I                                           |
|               | 303.15  | $9.0924 \cdot 10^{-4}$ | $9.3497 \cdot 10^{-4}$ | 2.830       | 3.822                 |                                                  |
|               | 313.15  | $1.6551 \cdot 10^{-3}$ | $1.6238 \cdot 10^{-3}$ | 2.180       | 6.964                 |                                                  |
|               | 323.15  | $2.6569 \cdot 10^{-3}$ | $2.7275 \cdot 10^{-3}$ | 2.537       | 11.189                |                                                  |
|               | 333.15  | $4.4749 \cdot 10^{-3}$ | $4.4458 \cdot 10^{-3}$ | 0.540       | 18.88                 |                                                  |
| acetonitrile  | 293.15  | $7.8859 \cdot 10^{-4}$ | $6.0665 \cdot 10^{-4}$ | 23.071      | 5.820                 | form III                                         |
|               | 303.15  | $1.3033 \cdot 10^{-3}$ | $1.2294 \cdot 10^{-3}$ | 5.431       | 9.623                 |                                                  |

|                                       |        |                        |                        |        |        |          |
|---------------------------------------|--------|------------------------|------------------------|--------|--------|----------|
|                                       | 313.15 | $2.4173 \cdot 10^{-3}$ | $2.3810 \cdot 10^{-3}$ | 1.612  | 17.868 |          |
|                                       | 323.15 | $4.2078 \cdot 10^{-3}$ | $4.4248 \cdot 10^{-3}$ | 5.101  | 31.161 |          |
|                                       | 333.15 | $8.0031 \cdot 10^{-3}$ | $7.9176 \cdot 10^{-3}$ | 1.030  | 62.49  |          |
| methanol/water<br>(30/70,v/v)         | 293.15 | $8.3539 \cdot 10^{-6}$ | $8.6558 \cdot 10^{-6}$ | 3.614  | 0.1423 |          |
|                                       | 303.15 | $1.5214 \cdot 10^{-5}$ | $1.5374 \cdot 10^{-5}$ | 1.053  | 0.1682 |          |
|                                       | 313.15 | $2.5667 \cdot 10^{-5}$ | $2.6347 \cdot 10^{-5}$ | 2.648  | 0.2592 | form II  |
|                                       | 323.15 | $4.3010 \cdot 10^{-5}$ | $4.3727 \cdot 10^{-5}$ | 1.668  | 0.3133 |          |
|                                       | 333.15 | $6.9422 \cdot 10^{-5}$ | $7.0535 \cdot 10^{-5}$ | 1.604  | 0.4372 |          |
| ethanol/water<br>(24/76,v/v)          | 293.15 | $3.0766 \cdot 10^{-5}$ | $2.6858 \cdot 10^{-5}$ | 12.703 | 0.4746 |          |
|                                       | 303.15 | $6.1580 \cdot 10^{-5}$ | $5.7309 \cdot 10^{-5}$ | 6.935  | 0.9674 |          |
|                                       | 313.15 | $1.0523 \cdot 10^{-4}$ | $1.1653 \cdot 10^{-4}$ | 10.741 | 1.4420 | form I   |
|                                       | 323.15 | $2.3337 \cdot 10^{-4}$ | $2.2686 \cdot 10^{-4}$ | 2.790  | 3.6616 |          |
|                                       | 333.15 | $4.2340 \cdot 10^{-4}$ | $4.2458 \cdot 10^{-4}$ | 0.280  | 6.5132 |          |
| ethanol/water<br>(55/45,v/v)          | 293.15 | $1.2637 \cdot 10^{-4}$ | $2.4088 \cdot 10^{-4}$ | 90.613 | 1.206  |          |
|                                       | 303.15 | $3.9262 \cdot 10^{-4}$ | $4.3874 \cdot 10^{-4}$ | 11.747 | 3.746  |          |
|                                       | 313.15 | $7.0763 \cdot 10^{-4}$ | $7.6957 \cdot 10^{-4}$ | 8.753  | 6.754  | form I   |
|                                       | 323.15 | $1.5223 \cdot 10^{-3}$ | $1.3049 \cdot 10^{-3}$ | 14.151 | 14.54  |          |
|                                       | 333.15 | $2.0561 \cdot 10^{-3}$ | $2.1465 \cdot 10^{-3}$ | 4.200  | 19.65  |          |
| acetonitrile/<br>Water<br>(25/75,v/v) | 293.15 | $1.7171 \cdot 10^{-5}$ | $2.3907 \cdot 10^{-5}$ | 39.227 | 0.247  |          |
|                                       | 303.15 | $2.7358 \cdot 10^{-5}$ | $3.7662 \cdot 10^{-5}$ | 37.663 | 0.393  |          |
|                                       | 313.15 | $6.2272 \cdot 10^{-5}$ | $5.7744 \cdot 10^{-5}$ | 7.272  | 0.895  | form III |
|                                       | 323.15 | $9.3962 \cdot 10^{-5}$ | $8.6444 \cdot 10^{-5}$ | 8.001  | 1.350  |          |
|                                       | 333.15 | $1.1693 \cdot 10^{-4}$ | $1.2675 \cdot 10^{-4}$ | 8.395  | 1.680  |          |
| acetonitrile/<br>Water<br>(58/42,v/v) | 293.15 | $2.2758 \cdot 10^{-4}$ | $3.0125 \cdot 10^{-4}$ | 32.371 | 2.315  |          |
|                                       | 303.15 | $5.8639 \cdot 10^{-4}$ | $5.2035 \cdot 10^{-4}$ | 11.262 | 5.968  |          |
|                                       | 313.15 | $8.3927 \cdot 10^{-4}$ | $8.6877 \cdot 10^{-4}$ | 3.515  | 8.545  | form III |
|                                       | 323.15 | $1.4348 \cdot 10^{-3}$ | $1.4071 \cdot 10^{-3}$ | 1.603  | 14.615 |          |
|                                       | 333.15 | $2.2051 \cdot 10^{-3}$ | $2.2182 \cdot 10^{-3}$ | 0.369  | 22.480 |          |

## 2. Single crystal structure

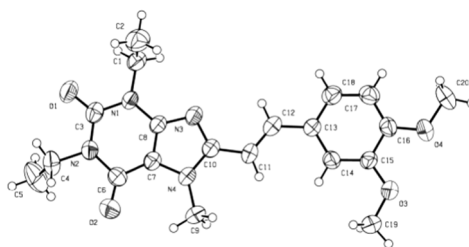

**Figure S1.** ORTEP view with labeling scheme for Istradefylline in ethanol.

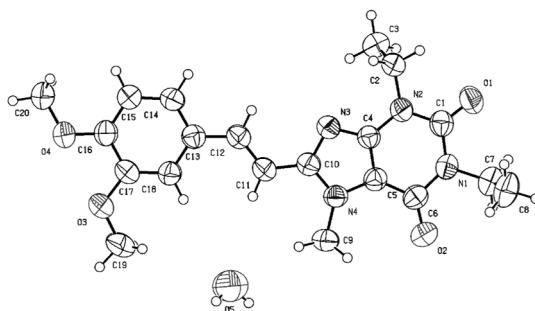

**Figure S2.** ORTEP view with labeling scheme for Istradefylline in methanol.

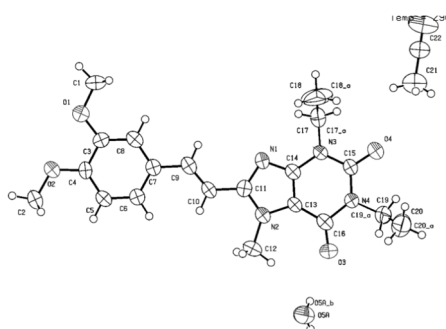

**Figure S3.** ORTEP view with labeling scheme for Istradefylline in acetonitrile.

Table S2. Bond Lengths for Istradefylline

| 1. Bond Lengths for Istradefylline in ethanol |          |         |          |
|-----------------------------------------------|----------|---------|----------|
| Bond                                          | Length/Å | Bond    | Length/Å |
| O3-C15                                        | 1.359(5) | C13-C18 | 1.386(7) |
| O3-C19                                        | 1.418(6) | C15-C14 | 1.377(7) |
| O1-C3                                         | 1.225(7) | C12-H12 | 0.93     |
| O2-C6                                         | 1.224(6) | C12-C11 | 1.327(8) |
| O4-C16                                        | 1.367(7) | C7-C6   | 1.423(8) |
| O4-C20                                        | 1.429(8) | C14-H14 | 0.931    |
| N4-C10                                        | 1.349(7) | C1-H1A  | 0.969    |
| N4-C7                                         | 1.391(7) | C1-H1B  | 0.971    |
| N4-C9                                         | 1.460(6) | C1-C2   | 1.499(6) |
| N3-C8                                         | 1.353(7) | C11-H11 | 0.93     |
| N3-C10                                        | 1.347(6) | C9-H9A  | 0.96     |
| N2-C3                                         | 1.395(6) | C9-H9B  | 0.96     |
| N2-C6                                         | 1.405(7) | C9-H9C  | 0.96     |
| N2-C4                                         | 1.480(8) | C18-H18 | 0.93     |
| N1-C8                                         | 1.369(6) | C18-C17 | 1.386(9) |
| N1-C3                                         | 1.385(7) | C17-H17 | 0.93     |
| N1-C1                                         | 1.463(6) | C4-H4A  | 0.97     |
| C8-C7                                         | 1.360(7) | C4-H4B  | 0.97     |
| C10-C11                                       | 1.445(7) | C4-C5   | 1.496(8) |
| C16-C15                                       | 1.410(7) | C19-H19 | 0.96     |
| C16-C17                                       | 1.372(7) | C2-H2   | 0.959    |
| C13-C12                                       | 1.460(7) | C5-H5   | 0.96     |

| C13-C14                                            | 1.399(6) | C20-H20  | 0.96     |
|----------------------------------------------------|----------|----------|----------|
| 2. Bond Lengths for Istradefylline in methanol     |          |          |          |
| Bond                                               | Length/Å | Bond     | Length/Å |
| O1-C1                                              | 1.222(5) | C5-C6    | 1.415(5) |
| O2-C6                                              | 1.236(5) | C7-H7    | 0.990    |
| O3-C17                                             | 1.375(4) | C7-C8    | 1.513(6) |
| O3-C19                                             | 1.408(7) | C8-H8    | 0.93     |
| O4-C16                                             | 1.343(4) | C9-H9    | 0.980    |
| O4-C20                                             | 1.428(5) | C10-C11  | 1.437(5) |
| N1-C1                                              | 1.405(5) | C11-C11  | 1.338(5) |
| N1-C6                                              | 1.404(5) | C12-C13  | 1.447(5) |
| N1-C7                                              | 1.473(5) | C13-C14  | 1.381(5) |
| N2-C1                                              | 1.368(4) | C13-C18  | 1.405(5) |
| N2-C2                                              | 1.480(5) | C14-H14  | 0.950    |
| N2-C4                                              | 1.373(4) | C15-H15  | 0.949    |
| N3-C4                                              | 1.339(4) | C14-C15  | 1.387(5) |
| N3-C10                                             | 1.351(4) | C15-C16  | 1.383(5) |
| N4-C5                                              | 1.386(4) | C16-C17  | 1.414(5) |
| N4-C9                                              | 1.461(4) | C17-C18  | 1.373(5) |
| N4-C10                                             | 1.363(4) | C18-H19  | 0.979    |
| C2-C3                                              | 1.519(6) | O1-C1    | 1.222(5) |
| C4-C5                                              | 1.382(5) | O2-C6    | 1.236(5) |
| C2-H2                                              | 0.93     | O3-C17   | 1.375(4) |
| C2-C3                                              | 1.399(4) | N1-C1    | 1.405(5) |
| C4-C5                                              | 1.382(5) | C1-C6    | 1.404(5) |
| 3. Bond Lengths for Istradefylline in acetonitrile |          |          |          |
| Bond                                               | Length/Å | Bond     | Length/Å |
| O1 C3                                              | 1.366    | H17A-C18 | 1.03     |
| O2-C2                                              | 1.421    | H17B-C18 | 1.01     |
| O2-C4                                              | 1.368    | C18-H18A | 0.96     |
| O3-C16                                             | 1.207    | C18-H18B | 0.96     |
| O4-C15                                             | 1.232    | C18-H18C | 0.96     |
| N1-C11                                             | 1.362    | C18-H17A | 1.03     |
| N1-C14                                             | 1.341    | C18-H17B | 1.01     |
| N2-C12                                             | 1.438    | C19-H19A | 0.97     |
| N2-C13                                             | 1.382    | C19-H19B | 0.97     |
| N3-C15                                             | 1.369    | C19-H20B | 1.238    |
| N3-C17                                             | 1.504    | C19-H20C | 1.303    |
| N3-C17                                             | 1.504    | H19A-C20 | 1.14     |
| N4-C15                                             | 1.373    | H19B-C20 | 1.029    |
| N4-C16                                             | 1.408    | C20-H20A | 0.96     |
| N4-C19                                             | 1.517    | C20-H19B | 1.029    |
| N4-C19                                             | 1.517    | H20B-C19 | 1.238    |
| C1-H1A                                             | 0.96     | H20C-C19 | 1.303    |

|          |       |          |       |
|----------|-------|----------|-------|
| C1-H1B   | 0.96  | C17-H17A | 0.969 |
| C2-H2A   | 0.961 | C17-H17B | 0.97  |
| C2-H2B   | 0.96  | C18-H18A | 0.96  |
| C3-C4    | 1.4   | C19-H19A | 0.97  |
| C3-C8    | 1.379 | C19-H19B | 0.97  |
| C4-C5    | 1.388 | C20-H20A | 0.96  |
| C5-H5    | 0.93  | N5-C22   | 1.055 |
| C5-C6    | 1.374 | C21-H21A | 0.961 |
| C6-H6    | 0.93  | C21-H21B | 0.96  |
| C6-C7    | 1.384 | C21-H21C | 0.959 |
| C7-C8    | 1.386 | C21-C22  | 1.391 |
| C7-C9    | 1.458 | C21-H21A | 0.961 |
| C8-H8    | 0.93  | C21-H21B | 0.96  |
| C9-H9    | 0.93  | C12-H12C | 0.96  |
| C9-C10   | 1.298 | C12-H12A | 0.96  |
| C10-H10  | 0.931 | C12-H12B | 0.959 |
| C10-C11  | 1.447 | C12-H12C | 0.96  |
| C12-H12A | 0.96  | C13-C14  | 1.353 |
| C12-H12B | 0.959 | C13-C16  | 1.425 |
| C17-H17B | 0.97  | C17-H17A | 0.969 |

#### 4. Torsion Angles for Istradefylline in ethanol

| Atom-Atom-Atom | Angle/°  | Atom-Atom-Atom | Angle/°  |
|----------------|----------|----------------|----------|
| C15-O3-C19     | 116.4(4) | O1-C3-N2       | 122.2(5) |
| C16-O4-C20     | 116.7(4) | O1-C3-N1       | 120.7(5) |
| C10-N4-C7      | 106.3(4) | N2-C3-N1       | 117.1(4) |
| C10-N4-C9      | 127.6(4) | N4-C7-C8       | 105.0(4) |
| C7-N4-C9       | 126.1(4) | N4-C7-C6       | 131.9(4) |
| C8-N3-C10      | 103.7(4) | C8-C7-C6       | 123.1(5) |
| C3-N2-C6       | 126.6(4) | C13-C14-C15    | 121.4(4) |
| C3-N2-C4       | 116.7(4) | C13-C14-H14    | 119.3    |
| C6-N2-C4       | 116.7(4) | C15-C14-H14    | 119.3    |
| C8-N1-C3       | 119.2(4) | N1-C1-H1A      | 109.1    |
| C8-N1-C1       | 121.5(4) | N1-C1-H1B      | 109      |
| C3-N1-C1       | 119.3(4) | N1-C1-C2       | 112.9(4) |
| N3-C8-N1       | 125.3(4) | H1A-C1-H1B     | 107.8    |
| N3-C8-C7       | 112.6(4) | H1A-C1-C2      | 109      |
| N1-C8-C7       | 122.2(4) | H1B-C1-C2      | 109      |
| N4-C10-N3      | 112.5(4) | C10-C11-C12    | 122.2(5) |
| N4-C10-C11     | 123.0(4) | C10-C11-H11    | 118.9    |
| N3-C10-C11     | 124.5(4) | C12-C11-H11    | 118.9    |
| O4-C16-C15     | 114.5(4) | N4-C9-H9A      | 109.5    |
| O4-C16-C17     | 125.8(5) | N4-C9-H9B      | 109.5    |
| C15-C16-C17    | 119.7(5) | N4-C9-H9C      | 109.5    |
| C12-C13-C14    | 122.3(4) | H9A-C9-H9B     | 109.5    |

|             |          |             |          |
|-------------|----------|-------------|----------|
| C12-C13-C18 | 119.6(5) | H9A-C9-H9C  | 109.4    |
| C14-C13-C18 | 118.0(5) | C16-C15-C14 | 119.3(4) |
| O3-C15-C16  | 115.5(4) | C13-C12-H12 | 116.2    |
| O3-C15-C14  | 125.2(4) | C13-C12-C11 | 127.4(5) |
|             |          | H12-C12-C11 | 116.4    |

#### 5. Torsion Angles for Istradefylline in methanol

| Atom-Atom-Atom | Angle/°  | Atom-Atom-Atom | Angle/°  |
|----------------|----------|----------------|----------|
| C16-O4-C20     | 116.6(3) | N4-C5-C6       | 132.7(3) |
| C1-N1-C6       | 126.8(3) | C4-C5-C6       | 123.0(3) |
| C1-N1-C7       | 115.4(3) | O2-C6-N1       | 120.8(3) |
| C6-N1-C7       | 117.7(3) | O2-C6-C5       | 127.4(3) |
| C1-N1-C2       | 119.8(3) | N1-C6-C5       | 111.9(3) |
| C1-N2-C4       | 120.4(3) | N1-C7-H7A      | 109.4    |
| C2-N2-C4       | 119.7(3) | N1-C7-H7B      | 109.4    |
| C4-N3-C10      | 103.9(3) | N1-C7-C8       | 111.3(4) |
| C5-N4-C9       | 125.8(3) | H7B -C7-H7A    | 108      |
| C5-N4-C10      | 106.7(3) | H7A -C7-C8     | 109.3    |
| C9-N4-C10      | 127.4(3) | H7B -C7-C8     | 109.4    |
| O1-C1-N1       | 120.9(3) | C7-C8-H8A      | 109.5    |
| O1-C1-N2       | 122.4(3) | C7-C8-H8B      | 109.4    |
| N1-C1-N2       | 116.6(3) | C7-C8-H8C      | 109.4    |
| N2-C2-H2       | 109.3    | O4-C8-H8A      | 109.5    |
| N2-C2-C3       | 111.7(3) | H8A-C8-H8B     | 109.6    |
| H2A-C2-H2B     | 107.9    | H8A-C8-H8C     | 109.5    |
| H2-C2-C3       | 109.3    | H8B-C8-H8C     | 109.4    |
| C2-C3-H3A      | 109.3    | N4-C9-H9A      | 109.5    |
| C2-C3-H3B      | 109.5    | N4-C9-H9B      | 109.5    |
| C2-C3-H3C      | 109.5    | N4-C9-H9C      | 109.5    |
| H3A-C3-H3B     | 109.5    | H9A-C9- H9B    | 109.5    |
| H3A-C3-H3C     | 109.5    | H9B-C9- H9C    | 109.5    |
| H3B-C3-H3C     | 109.5    | N3-C10-N4      | 112.0(3) |
| N2-C4-N3       | 125.8(3) | N4-C10-C11     | 123.4(3) |
| N2-C4-C5       | 121.1(3) | C10-C11-H11    | 119.1    |
| N3-C4-C5       | 113.0(3) | C10-C11-C12    | 121.8(3) |
| N4-C5-N4       | 104.2(3) | H114-C11-C12   | 119.1    |

#### 6. Torsion Angles for Istradefylline in acetonitrile

| Atom-Atom-Atom | Angle/° | Atom-Atom-Atom | Angle/° |
|----------------|---------|----------------|---------|
| C1-O1-C3       | 117.1   | O1-C1-H1B      | 109.5   |
| C2-O2-C4       | 117.9   | O1-C1-H1B      | 109.5   |
| C11-N1-C14     | 102.8   | H1A-C1-H1B     | 109.5   |
| C11-N2-C12     | 128.1   | H1A-C1-H1B     | 109.5   |
| C11-N2-C13     | 106.5   | H1B-C1-H1B     | 109.5   |
| C12-N2-C13     | 125.4   | O2-C2-H2A      | 109.4   |
| C14-N3-C15     | 119.3   | H2A-C2-H2B     | 109.4   |

|             |       |           |       |
|-------------|-------|-----------|-------|
| C14-N3-C17  | 119.7 | O1-C3-C4  | 115.2 |
| C14-N3-C17  | 119.7 | O1-C3-C8  | 126   |
| C15-N3-C17  | 118.5 | C4-C3-C8  | 118.8 |
| C15-N3-C17  | 118.5 | O2-C4-C3  | 116.1 |
| C17-N3-C17  | 31.5  | O2-C4-C5  | 124.3 |
| C15-N4-C16  | 126.6 | C3-C4-C5  | 119.6 |
| C15-N4-C19  | 114.9 | C4-C5-H5  | 120   |
| C15-N4-C19  | 114.9 | C5-C6-H6  | 119.1 |
| C16-N4-C19  | 115   | C5-C6-C7  | 121.6 |
| C16-N4-C19  | 115   | H6-C6-C7  | 119.3 |
| C19-N4-C19  | 40    | C6-C7-C8  | 117.8 |
| O1-C1-H1A   | 109.4 | C6-C7-C9  | 121.5 |
| H9-C9-C10   | 116.6 | C8-C7-C9  | 120.7 |
| C9-C10-H10  | 116.2 | C3-C8-C7  | 122.2 |
| C9-C10-C11  | 127.4 | C3-C8-H8  | 118.9 |
| H10-C10-C11 | 116.3 | C7-C8-H8  | 119   |
| N1-C11-N2   | 112.5 | C7-C9-H9  | 116.5 |
| N1-C11-C10  | 125.1 | C7-C9-C10 | 126.9 |
| N2-C11-C10  | 122.4 |           |       |

### 3. Preparation of three kinds of crystal istradefylline tablets

#### 3.1 Materials

Lactose (Lactose Anhydrous), model: NF DTHV, batch number (Lot): B590000698, manufacturer: Kerry Inc-Rothschild, production date: 2019.09.09, valid until: 2022.09.08.

Microcrystalline Cellulose (MCC, Microcrystalline Cellulose), trademark: VIVAPUR®, model: PH 102, batch number (Batch No.): 56102193215, manufacturer: J. Rettenmaier & Sohne GmbH + Co. KG, production date: 2019.04, valid until: 2024.04.

Crospovidone (PVPP), trademark: Kollidon®, model:CL-F, batch number (Lot): 60547747G0, manufacturer: BASF SE, production date: 2019.03, valid until: 2022.03.

Magnesium Stearate, Trademark: LIGAMED®, Model: MF-2-V, Batch No.: C024748, Manufacturer: Peter Greven Nederland CV, Production Date: 2020.02, Valid until: 2024.02 .

To prepare the istradefylline tablets, prescribed amount of istradefylline and lactose was weighed and grinded in a mortar for 5 min (The median particle size of crystal form I/II/III is 5.6um, 5.2um, 7.1um respectively).

#### 3.2 specific surface area

#### crystal I

|                  |                                                               |       |                     |
|------------------|---------------------------------------------------------------|-------|---------------------|
| superficial area | BET specific surface area of single point is 0.20000 at P/Po: | 4.667 | (m <sup>2</sup> /g) |
|                  | BET specific surface area of multipoint:                      | 5.081 | (m <sup>2</sup> /g) |
|                  | Surface area of micropores by T - diagram method:             | 0.000 | (m <sup>2</sup> /g) |
|                  | External surface areabyT - diagram method:                    | 5.081 | (m <sup>2</sup> /g) |

#### pore volume

|                                                      |       |                      |
|------------------------------------------------------|-------|----------------------|
| Total volume of micropores (<2nm) by T-graph method: | 0.000 | (cm <sup>3</sup> /g) |
|------------------------------------------------------|-------|----------------------|

#### crystal II

|                  |                                                               |         |                     |
|------------------|---------------------------------------------------------------|---------|---------------------|
| superficial area | BET specific surface area of single point is 0.20000 at P/Po: | 4.73746 | (m <sup>2</sup> /g) |
|                  | BET specific surface area of multipoint:                      | 5.50915 | (m <sup>2</sup> /g) |

#### crystal III

|                  |                                                               |         |                     |
|------------------|---------------------------------------------------------------|---------|---------------------|
| superficial area | BET specific surface area of single point is 0.20000 at P/Po: | 4.71559 | (m <sup>2</sup> /g) |
|                  | BET specific surface area of multipoint:                      | 5.18539 | (m <sup>2</sup> /g) |

#### BET equation

$$(P/Po)/[V(1-P/Po)] = (C-1)/(V_m \cdot C) \cdot P/Po + 1/(V_m \cdot C)$$

(the N<sub>2</sub>) Sw = 4.35 \* Vm / Mass

Single point BET equation(C>>1)

$$V_m = V \cdot (1 - P/Po)$$

Figure S4. The surface area of three crystal forms

## 4. Thermogravimetric analysis (TGA) curves and IR

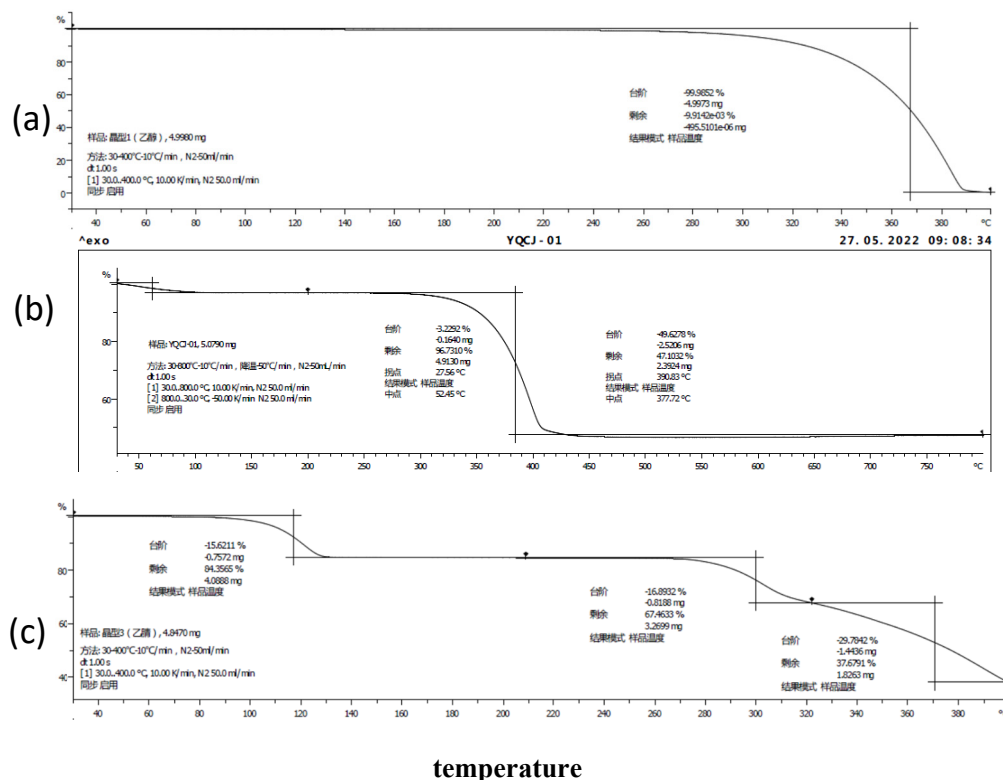

Figure S5. (a)The TGA curves of From I, (b) The TGA curves of From II and (c) The TGA curves of From III.



From I

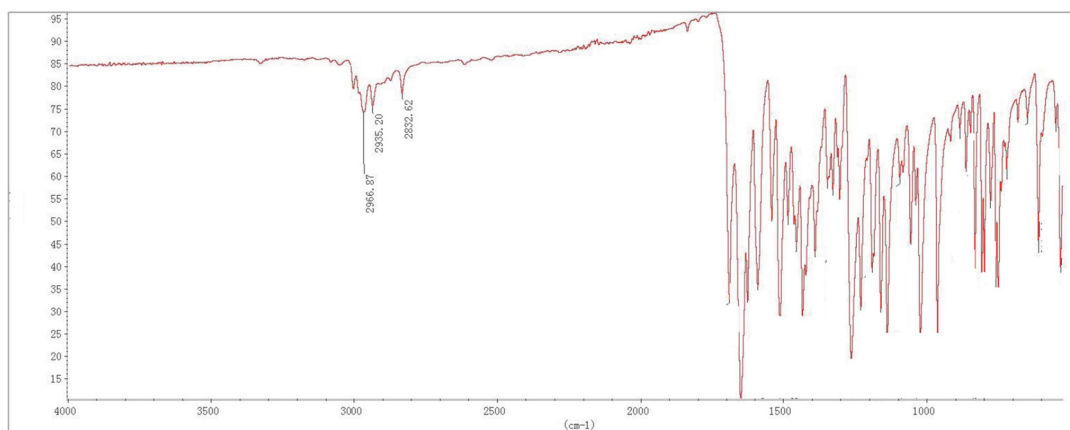

From II

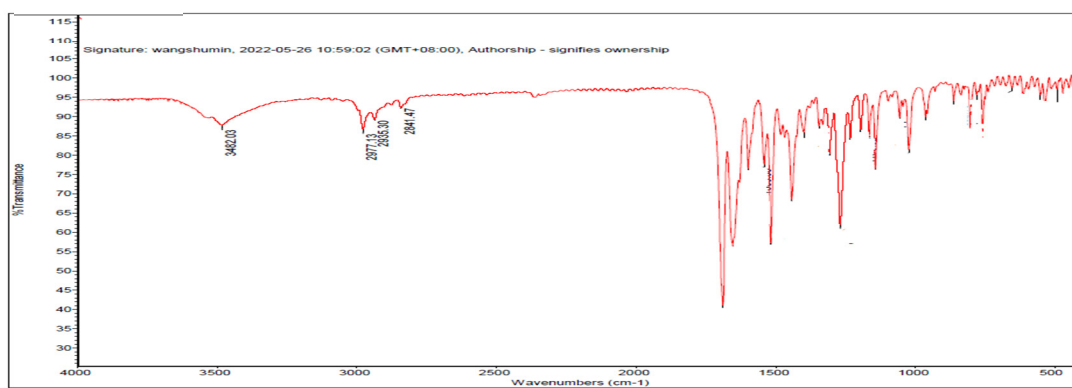

From III

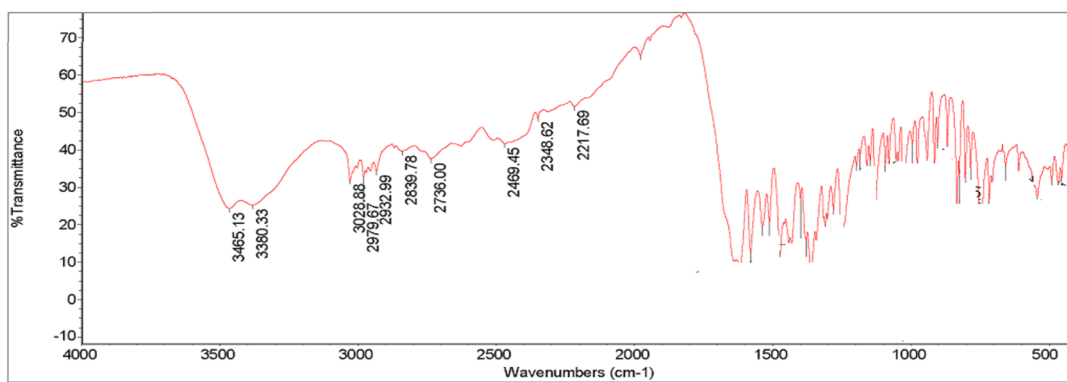

**Figure S6.** The IR of From I, The IR of From II and The IR of From III.

## 5. Stability data

Table S3. Stability data of Istradefylline (Form I of istradefylline)

Packaging Configuration: The packaging of the stability study samples is simulate to the market package. The samples is contained in two-layer PE bags. Fiber drums are used for external packages, sealed with plastic sealing.

**Temperature: 25±2℃ Humidity: 60±5% Samples are packed under simulated market container**

| Batch No. | Detection time | Storage time | Appearance                                         | Loss on Drying (%) | Assay (on dry basis ,%) | Related substance(%) |              |              |              |                            |                             |                  |
|-----------|----------------|--------------|----------------------------------------------------|--------------------|-------------------------|----------------------|--------------|--------------|--------------|----------------------------|-----------------------------|------------------|
|           |                |              |                                                    |                    |                         | Impurity A           | Impurity C   | Impurity E   | Impurity Z   | 4-Desmethyl istradefylline | Other individual impurities | Total impurities |
|           |                |              | Light yellow to yellowish green crystalline powder | ≤0.5               | 98.0-102.0              | ≤0.1                 | ≤0.4         | ≤0.1         | ≤0.1         | ≤0.1                       | ≤0.1                        | ≤1.0             |
| 1608002   | 2016.8.16      | 0month       | Yellowish green crystalline powder                 | 0.03               | 99.9                    | 0.01                 | not detected | not detected | 0.006        | not detected               | 0.02                        | 0.05             |
|           | 2017.2.9       | 3month       | Yellowish green crystalline powder                 | 0.03               | 100.0                   | 0.1                  | not detected | not detected | 0.1          | not detected               | 0.03                        | 0.3              |
| 1608003   | 2016.11.8      | 0month       | Yellowish green crystalline powder                 | 0.04               | 99.7                    | 0.01                 | not detected | not detected | not detected | not detected               | 0.02                        | 0.05             |
|           | 2017.2.9       | 3month       | Yellowish green crystalline powder                 | 0.03               | 99.9                    | 0.1                  | not detected | not detected | 0.2          | not detected               | 0.03                        | 0.4              |
| 1608004   | 2016.11.8      | 0month       | Yellowish green crystalline powder                 | 0.03               | 99.6                    | 0.02                 | not detected | not detected | not detected | not detected               | 0.02                        | 0.05             |
|           | 2017.2.9       | 3month       | Yellowish green crystalline powder                 | 0.03               | 100.1                   | 0.09                 | not detected | not detected | 0.1          | not detected               | 0.03                        | 0.3              |
